# Supplementary material
Source: MDPI journal article supplement (https://www.mdpi.com/2673-7426/2/2/19)
Supplement: s1 [file s1 › SUPPLEMENTARY MATERIALS 220307.pdf]

## SUPPLEMENTARY MATERIALS

### Assessing the computational load of training the RNN models

Assessing the computational load of training the RNN models is difficult and can have a large margin of error because of the following reasons:

- 1- Testing the training time for different models requires providing identical environment for CPU including having all programs closed and having all backend programs and calculations suspended. The first is easy to satisfy but the second is not straightforward in Windows environment. Using commands like “tic toc”, is available in both Matlab and Python but is inaccurate in Python. In Matlab environment this command calculates “the number of operations” as well as “the execution time”. The execution time is not going to be a reliable because of the second problem stated above, but the “the number of operations” is accurate. Unfortunately, this option is not available in Python environment yet.
- 2- Backpropagation starts with randomizing all parameters of all NN models and the initial values of these parameters highly affects the execution time. Each time the model is trained, a different time is obtained. Only an approximate value will be obtained by training the model multiple times and averaging the outcomes.
- 3- Terminating the training of a NN model is performed manually, based on inspecting the learning curve and intuitively deciding when to terminate the training process. This causes a biased interpretation of the execution times.

As a solution to the above issues, we compared the number of learnable parameters. These values can be highly informative as the number of dropouts at each model is fixed and the number of learnable parameters at each epoch (iteration) is invariant. The following table summarizes the number of learnable parameters for each RNN model used in this study for one randomly selected subject (Subject 10).

Table S1. The number of learnable parameters in various RNN models trained in this study.

| <b>LSTM Model</b> | <b>Layers</b> | <b>Learnable parameters:</b> |
|-------------------|---------------|------------------------------|
|                   | LSTM          | 4600                         |
|                   | Dense#1       | 650                          |
|                   | Drop out #1   | 0                            |
|                   | Dense#2       | 650                          |
|                   | Drop out #2   | 0                            |
|                   | <b>TOTAL</b>  | <b>5900</b>                  |

| <b>1D convolutional layer+LSTM</b> | <b>Layers</b>                      | <b>Learnable parameters:</b> |
|------------------------------------|------------------------------------|------------------------------|
|                                    | Time-distributed 1D convolution #1 | 2112                         |
|                                    | Time-distributed Droup out #1      | 0                            |
|                                    | Time-distributed Maxpool #1        | 0                            |
|                                    | Time-distributed 1D convolution #2 | 8256                         |
|                                    | Time-distributed Droup out #2      | 0                            |
|                                    | Time-distributed Maxpool #2        | 0                            |
|                                    | Time-distributed Flatten           | 0                            |
|                                    | LSTM                               | 11920                        |
|                                    | Droup out #3                       | 0                            |
|                                    | Dense                              | 420                          |
|                                    | Droup out #4                       | 0                            |
|                                    | Dense with Softmax                 | 84                           |
|                                    | <b>TOTAL</b>                       | <b>22792</b>                 |

| <b>1D convolutional Bi-LSTM</b> | <b>Layers</b>                      | <b>Learnable parameters:</b> |
|---------------------------------|------------------------------------|------------------------------|
|                                 | Time-distributed 1D convolution #1 | 2112                         |
|                                 | Time-distributed Droup out #1      | 0                            |
|                                 | Time-distributed Maxpool #1        | 0                            |
|                                 | Time-distributed 1D convolution #2 | 8256                         |
|                                 | Time-distributed Droup out #2      | 0                            |
|                                 | Time-distributed Maxpool #2        | 0                            |
|                                 | Time-distributed Flatten           | 0                            |
|                                 | LSTM                               | 23840                        |
|                                 | Droup out #3                       | 0                            |
|                                 | Dense                              | 820                          |
|                                 | Droup out #4                       | 0                            |
|                                 | Dense with Softmax                 | 84                           |
|                                 | <b>TOTAL</b>                       | <b>35112</b>                 |

| <b>Conv2DLSTM</b> | <b>Layers</b>                      | <b>Learnable parameters:</b> |
|-------------------|------------------------------------|------------------------------|
|                   | ConvLSTM2D                         | 41216                        |
|                   | Droupout #1                        | 0                            |
|                   | Flatten                            | 0                            |
|                   | Time-distributed 1D convolution #2 | 2580                         |
|                   | Droupout #2                        | 0                            |
|                   | Dense                              | 420                          |
|                   | Droupout #3                        | 0                            |
|                   | Dense with Softmax                 | 84                           |
|                   | <b>TOTAL</b>                       | <b>44300</b>                 |

The number of neurons, filters in convolution layers, kernel size (filters in convolution layers) vary from subject to subject. They remain constant for running a model for a subject, with different random seeds.

As a comparison between 1D convolutional LSTM and 1D convolutional Bi-LSTM, technically Bi-LSTM uses one extra LSTM layer in the structure of the model. However, the extra LSTM layer is not added to the model as a sequential layer. This layer is trained simultaneously with the other LSTM layer, but in reverse direction and the outcome of each are merged to obtain the output value. Hence, Bi-LSTM model has more parameters (equal to an extra LSTM layer) to be trained and adjusted.

Based on the above tables, LSTMs are the most computational demanding blocks in the model. A quick comparison between 1D conv-LSTM and 1D-Bi-LSTM, shows that the number of learnable parameters increased by at least 54%, mainly stemmed from an extra embedded LSTM in Bidirectional layer. While comparing adjustable parameters may not be the most accurate way of assessing computational loads required for training models, it provides a good indication about the relative variations in computational loads.
